# Supplementary material for: Discovery of urinary metabolomic biomarkers for early detection of acute kidney injury
Source: Royal Society of Chemistry journal article supplement (doi:10.1039/c5mb00492f), 2015-11-02
Supplement: c5mb00492f1.zip [file c5mb00492f1.zip]

**Supplementary Fig. 1.** Male Sprague-Dawley rats were administered with saline (control) or cisplatin (10 mg/kg) and urine samples were collected for 3 days after the last treatment. Analysis of metabolites in urine samples was carried out on a Varian (Varian, Inc., Palo Alto, CA) with working frequency of 600.167 MHz at a temperature of 299.1 K. Metabolite concentrations are compared between control and cisplatin-treated groups. The fold changes of various metabolites detected in the urine of Sprague–Dawley rats were indicated.

**Supplementary Fig. 2.** Changes in 3-indoxyl sulfate levels in urine, left kidney, and serum. Male Sprague-Dawley rats were injected with CCl<sub>4</sub> (0.5 mg/kg), and the urine, serum, and left kidney were collected at the indicated time points.
